# Supplementary material for: Quantitative Model of Cell Cycle Arrest and Cellular Senescence in Primary Human Fibroblasts
Source: PLOS journal article supplement (doi:10.1371/journal.pone.0042150), 2012-08-07
Supplement: S2 (10.1371/journal.pone.0042150.s002) [file journal.pone.0042150.s002]

## Supplement S2 Sensitivity analysis

The sensitivity of each parameter  $k$  was approximated by fixating all parameters except for  $k$ , which was uniformly varied in the vicinity of 10% around its optimal value. Repeated 100 times for each parameter, this resulted in a set of 100 simulation runs per parameter  $k$ . The variance of the final population doubling (PD) values of these runs was further analyzed and interpreted as sensitivity measure to variation of parameter  $k$ .

The sensitivity  $s_k$  for variation of parameter  $k$  was calculated via

$$s_k = \frac{1}{n-1} \left( \sum_{i=1}^n (x_i - \bar{x})^2 \right)^{\frac{1}{2}},$$

with  $n$  being the number of simulation runs and  $x_i$  the final PD value of simulation  $i$ .

This procedure was conducted using the BJ and WI-38 replicative senescence data and has been repeated for every parameter given by model Equations 3a-d and 4. The sensitivities resulting from the variation of single parameter values are shown in Figure S2.1.

**Figure S2.1**

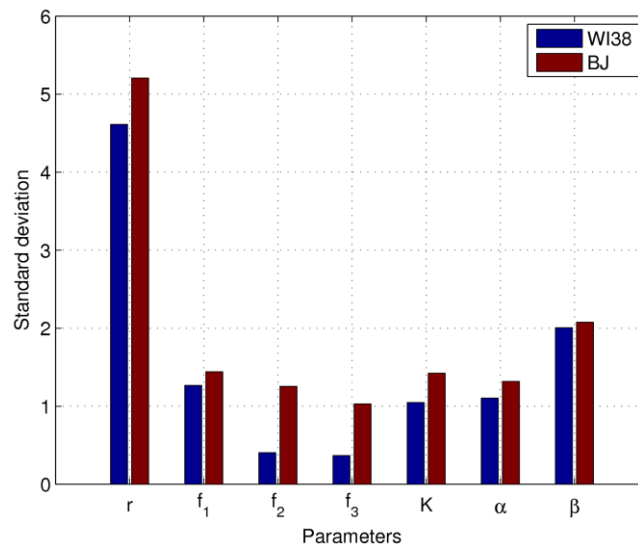

Sensitivity of model parameters as described by Eq. 3a-d and Eq. 4. The model is most sensitive to the variation of the growth rate  $r$ , resembling its particular importance for the maximal replicative capacity of cell cultures. Regarding the parameters  $f_{1-3}$ , BJ as well as WI-38 cells show qualitatively the highest sensitivity for  $P \rightarrow C$  transition, followed by its back transition (with rate  $f_2$ ) and the  $C \rightarrow S$  transition rate  $f_3$ . Interestingly, WI-38 cells are notably less sensitive to  $f_2$  and  $f_3$  variation than BJ cells.  $\beta$  shows a higher sensitivity than  $\alpha$ , as it is a concentration dependent parameter, whereas concentration independent  $\alpha$  is responsible for linearly accumulating long term stress.
